# Supplementary material for: Self-propelled continuous transport of nanoparticles on a wedge-shaped groove track
Source: Royal Society of Chemistry journal article supplement (doi:10.1039/d2nr05875h), 2023-01-01
Supplement: d2nr05875h1.pdf [file d2nr05875h1.pdf]

## Supporting Information

# Self-propelled Continuous Transport of Nanoparticles on A Wedge-Shaped Groove Track

Shaoqian Hao<sup>a,b</sup>, Zhang Xie<sup>c</sup>, Wenyuan Wang<sup>b</sup>, Jianlong Kou<sup>b</sup>, and  
Fengmin Wu<sup>a,b</sup>

<sup>a</sup>*Institute of Theoretical Physics, Shanxi University, Taiyuan 030006, China*

<sup>b</sup>*Institute of Condensed Matter Physics, Zhejiang Provincial Key Laboratory of Solid State Optoelectronic Devices, Zhejiang Normal University, Jinhua 321004, China*

<sup>c</sup>*Center for Soft Condensed Matter Physics and Interdisciplinary Research, Soochow University, Suzhou 215006, China*

### Section I: Calculation of the driving force for Stage II ( $-12 < x \leq -3.5$ nm)

The contact area of the flake and substrate  $A_{f-s}$  can be expressed as

$$\begin{aligned} A_{f-s} &= W \left( -x - \frac{W}{2 \tan \frac{\varphi}{2}} + \frac{L}{2} \right) + \left[ \left( -x - \frac{L}{2} \right) \tan \frac{\varphi}{2} + \frac{W}{2} \right] \left( x + \frac{W}{2 \tan \frac{\varphi}{2}} + \frac{L}{2} \right) = -\tan \frac{\varphi}{2} x^2 \\ &\quad + \frac{WL}{2} - \frac{W^2}{4 \tan \frac{\varphi}{2}} - \frac{L^2}{4} \tan \frac{\varphi}{2} \end{aligned}$$

Where,  $\varphi$  denotes the angle of the substrate,  $x$  denotes the local position of the CoM of the flake,  $W$  and  $L$  are the width and length of the flake, respectively. Thus, we can obtain the vdW interaction energy from the substrate

$$U_{sub} = -A_{f-s} E_{sub}$$

Therefore, the force exerted on the flake from the substrate is

$$F_{sub} = -\frac{\partial U_{sub}}{\partial x} = \left(-2\tan\frac{\varphi}{2}x - L\tan\frac{\varphi}{2} - W\right)E_{sub}$$

## Section II: Calculation of the driving force for Stage III ( $-3.5 < x < 3.5$ nm)

When the flake moves to the stage III ( $-3.5 < x < 3.5$  nm), the contact area of the flake with the upper layer of the first and second track are

$$A_{up1} = \left(-x + \frac{L}{2}\right)W - \left(-x + \frac{L}{2}\right)^2\tan\frac{\theta}{2}$$

$$A_{up2} = \left(x + \frac{L}{2}\right)W - \left(x + \frac{L}{2}\right)\left[\left(L_{rail} - \frac{L}{2} - x\right)\tan\frac{\theta}{2} + L_{rail}\tan\frac{\theta}{2}\right]$$

The total contact area between the flake and the upper layer is therefore obtained as

$$A_{up} = A_{up1} + A_{up2}$$

Therefore, the driving force from the upper layer is

$$F_{up} = -\frac{\partial(-A_{up}E_{up})}{\partial x} = -2(L_{rail} - L)\tan\frac{\theta}{2}E_{up}$$

The contact area of the flake with the substrate of the first and second track are

$$A_{sub1} = \tan\frac{\varphi}{2}\left(-x + \frac{L}{2}\right)^2$$

$$A_{sub2} = W\left(x + \frac{L}{2}\right)$$

The total contact area between the flake and the substrate is obtained as

$$A_{sub} = A_{sub1} + A_{sub2}$$

Thus, we get the driving force from the substrate

$$F_{sub} = -\frac{\partial(-A_{f-s}E_{sub})}{\partial x} = \left(2\tan\frac{\varphi}{2}x - L\tan\frac{\varphi}{2} + W\right)E_{sub}$$
